# Supplementary material for: Reduced GFAP Expression in Bergmann Glial Cells in the Cerebellum of Sigma-1 Receptor Knockout Mice Determines the Neurobehavioral Outcomes after Traumatic Brain Injury
Source: MDPI journal article supplement (doi:10.3390/ijms222111611), 2021-10-27
Supplement: s1 [file s1]

## Supplementary materials

**Table S1.** Spontaneous alternations (%) in the y-maze test at 1, 3, 6, 9 and 12 months after TBI.

| Time, months | 1      | 3      | 6      | 9      | 12     |
|--------------|--------|--------|--------|--------|--------|
| WT sham      | 60 ± 3 | 46 ± 4 | 49 ± 2 | 64 ± 4 | 48 ± 4 |
| WT TBI       | 55 ± 4 | 61 ± 3 | 54 ± 4 | 61 ± 4 | 50 ± 3 |
| S1R-/- sham  | 53 ± 2 | 56 ± 2 | 49 ± 3 | 56 ± 4 | 55 ± 5 |
| S1R-/- TBI   | 53 ± 3 | 55 ± 5 | 46 ± 5 | 48 ± 3 | 45 ± 5 |

All values are presented as means ± SEM. *p* values for differences between groups were calculated using RM two-way ANOVA followed by Fisher's LSD test. WT sham *n*=9, WT TBI *n*=7–10, S1R-/- sham *n*=5–8, S1R-/- TBI *n*=7–10.

**Table S2.** Time spent in open quadrants of the elevated zero maze at 1, 8, and 12 months after TBI.

| Time, months | 1              | 3              | 8              |
|--------------|----------------|----------------|----------------|
| WT sham      | 98.79 ± 11.96  | 130.46 ± 11.68 | 120.51 ± 8.23  |
| WT TBI       | 106.86 ± 8.76  | 129.47 ± 13.85 | 125.17 ± 17.57 |
| S1R-/- sham  | 60.08 ± 10.05* | 90.38 ± 15.18  | 112.63 ± 10.28 |
| S1R-/- TBI   | 82.81 ± 9.48   | 76.13 ± 12.97  | 92.15 ± 5.40*  |

All values are presented as means ± SEM. *p* values for differences between groups were calculated using RM two-way ANOVA followed by Fisher's LSD test: \**p* < 0.05 WT TBI vs. S1R-/- TBI, ^*p* < 0.05 WT sham vs. S1R-/- sham. WT sham *n* = 9, WT TBI *n*=7–10, S1R-/- sham *n*=5–8, S1R-/- TBI *n*=7–10.

**Table S3.** The total distance travelled (cm) in an open-field apparatus at 7 days and 3, 6, 9 and 12 months after TBI.

| Time        | Days       |            | Months     |            |            |  |  |
|-------------|------------|------------|------------|------------|------------|--|--|
|             | 7          | 3          | 6          | 9          | 12         |  |  |
| WT sham     | 5738 ± 211 | 5569 ± 443 | 5172 ± 346 | 6030 ± 538 | 5878 ± 594 |  |  |
| WT TBI      | 6207 ± 426 | 7026 ± 600 | 6214 ± 698 | 7299 ± 711 | 6819 ± 601 |  |  |
| S1R-/- sham | 5811 ± 374 | 6087 ± 440 | 5884 ± 703 | 5041 ± 455 | 6319 ± 521 |  |  |
| S1R-/- TBI  | 5558 ± 162 | 6143 ± 280 | 5651 ± 124 | 5599 ± 535 | 5551 ± 444 |  |  |

All values are presented as means ± SEM. *p* values for differences between groups were calculated using RM two-way ANOVA followed by Fisher's LSD test. WT sham *n*=9, WT TBI *n*=7–10, S1R-/- sham *n*=5–8, S1R-/- TBI *n*=7–10.

**Table S4.** Food (mg/kg body weight) and water (ml/kg body weight) consumption and voluntary activity (running wheel rotations) at 72 h, 1, 3 and 6 months after TBI.

| Time, months | 1            |              |               |                | 3            |               |               |                | 6             |               |               |                |
|--------------|--------------|--------------|---------------|----------------|--------------|---------------|---------------|----------------|---------------|---------------|---------------|----------------|
|              | Food         |              | Drink         |                | Food         |               | Drink         |                | Food          |               | Drink         |                |
|              |              |              |               |                |              |               |               |                |               |               |               |                |
|              |              |              | Activity Dark | Activity Light |              |               | Activity Dark | Activity Light |               |               | Activity Dark | Activity Light |
| WT sham      | 0.093 ± 0.01 | 0.112 ± 0.01 | 3589 ± 755    | 2156 ± 849     | 0.126 ± 0.01 | 0.091 ± 0.005 | 5422 ± 1098   | 3393 ± 816     | 0.098 ± 0.01  | 0.070 ± 0.01  | 3874 ± 488    | 1772 ± 442     |
| WT TBI       | 0.101 ± 0.01 | 0.132 ± 0.01 | 6409 ± 1312   | 3913 ± 1067    | 0.111 ± 0.01 | 0.067 ± 0.01  | 5546 ± 1600   | 1981 ± 603     | 0.094 ± 0.01  | 0.072 ± 0.01  | 4688 ± 1560   | 1525 ± 780     |
| S1R-/- sham  | 0.101 ± 0.01 | 0.106 ± 0.01 | 7369 ± 1140   | 2271 ± 337     | 0.107 ± 0.01 | 0.082 ± 0.01  | 8002 ± 726    | 2550 ± 704     | 0.110 ± 0.004 | 0.094 ± 0.004 | 5258 ± 851    | 1676 ± 268     |
| S1R-/- TBI   | 0.106 ± 0.01 | 0.099 ± 0.01 | 5300 ± 1040   | 3079 ± 253     | 0.107 ± 0.01 | 0.084 ± 0.01  | 7456 ± 327    | 1785 ± 388     | 0.138 ± 0.02  | 0.101 ± 0.02  | 6112 ± 1244   | 2223 ± 217     |

All values are presented as means ± SEM. *p* values for differences between groups were calculated using RM two-way ANOVA followed by Fisher's LSD test, *n* = 7–8.

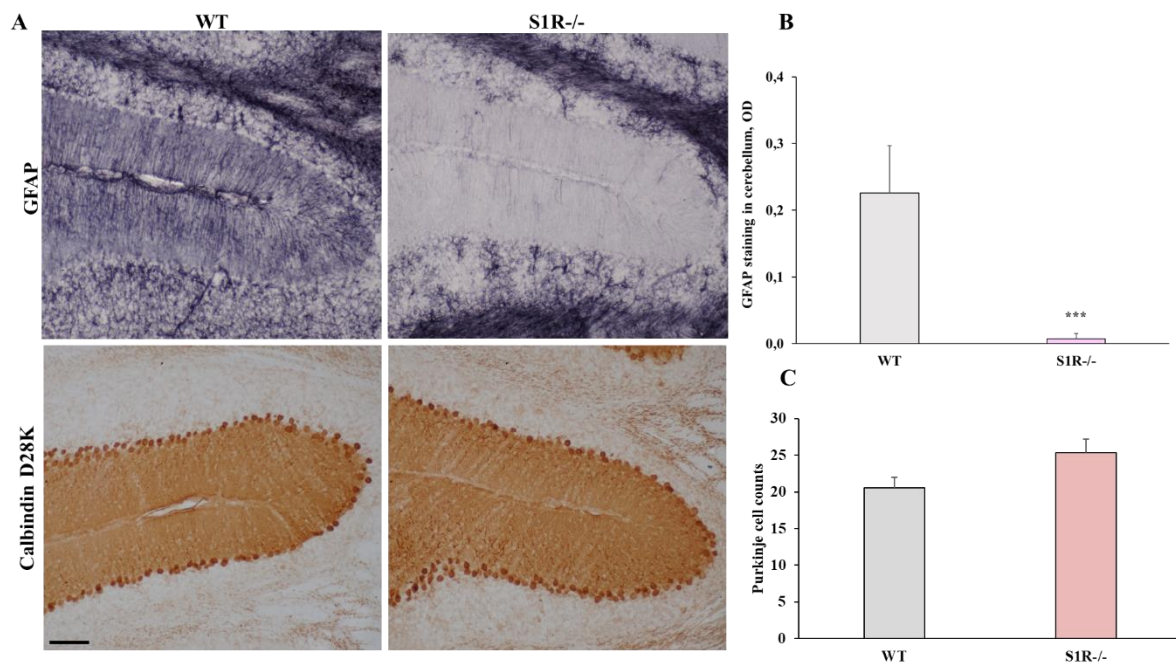

**Figure S1.** GFAP and Calbindin D28K staining in the cerebellum before TBI. **(A)** Representative images of GFAP and Calbindin D28K staining in the cerebellum (scale bar = 50  $\mu$ m). **(B)** Optical density (OD) of the intensity of GFAP staining in the molecular layer of the cerebellum in WT and S1R-/- animals. **(C)** Total count of Purkinje cells in the Purkinje cell layer of the cerebellum in WT and S1R-/- animals. All values are presented as the means  $\pm$  SEM. *p* values for differences between groups were calculated using the Mann-Whitney U-test, (*n* = 3): \*\*\**p* < 0.001 WT vs. S1R-/-.

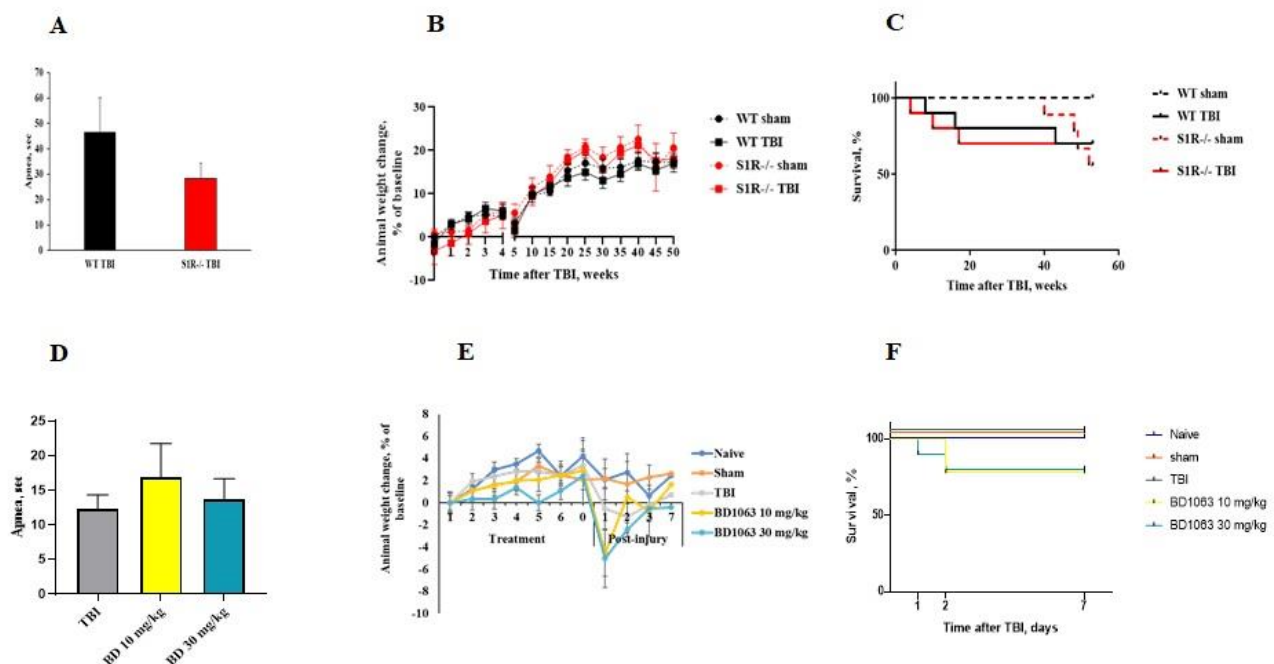

**Figure S2.** General health monitoring after TBI. **(A)** Apnoea, **(B)** body weight changes and **(C)** mortality in WT and S1R-/- mice after TBI. TBI did not affect general health. **(D)** Apnoea, **(E)** body weight changes and **(F)** mortality in WT mice treated with BD-1063 after TBI. BD-1063 treatment did not influence outcomes after the injury. All values are presented as means  $\pm$  SEM. *p* values for body weight differences between groups were calculated using two-way ANOVA followed by Fisher's LSD test. Differences in apnoea after TBI between the WT and S1R-/- groups and TBI and BD-1063 10–30 mg/kg groups were calculated using the Mann-Whitney U-test and ordinary one-way ANOVA, respectively. Differences in overall mortality rates were calculated using the chi-square test.
